# Supplementary material
Source: publisher figshare collection journal article supplement (https://tandf.figshare.com/ndownloader/files/17544500)
Supplement: Supplementary file 1 [file 17544500]

**Supplemental File**

**Development of a fast UHPLC-MS/MS for the analysis of selected priority micropollutants in wastewater samples**

Elżbieta Słocka1, Sylwia Bajkacz1,[[1]](#footnote-2), Ewa Felis2,3, Adam Sochacki2,3,4

*1**Silesian University of Technology,**Faculty of Chemistry,* ***Department of Inorganic, Analytical Chemistry and Electrochemistry****, ul. B. Krzywoustego 6, 44-100 Gliwice, Poland*

*2 Silesian University of Technology, Centre for Biotechnology, ul. B. Krzywoustego 8, 44-100 Gliwice, Poland*

*3 Silesian University of Technology, Faculty of Power and Environmental Engineering, Environmental Biotechnology Department, ul. Akademicka 2, 44-100 Gliwice, Poland*

*4 Czech University of Life Sciences Prague, Faculty of Environmental Sciences, Department of Applied Ecology, Kamýcká 129, 165 00 Prague, Czech Republic*

Table of contents

[**1.** **Introduction** 4](#__RefHeading___Toc7601041)

[Table S1. The structures and chemical properties of 1*H*-benzotriazole, clarithromycin and imidacloprid. 4](#__RefHeading___Toc7601042)

[Table S2. Comparison of the developed UHPLC-MS/MS method with methods of determination of 1*H*-benzotriazole, clarithromycin and imidacloprid in water samples described in the literature. 5](#__RefHeading___Toc7601043)

[**2.** **Experimental** 7](#__RefHeading___Toc7601044)

[**2.6.** ***Determination of BTA, IDC and CTM and detection of their TPs in wastewater during biotransformation tests.*** 7](#__RefHeading___Toc7601045)

[Table S3. The detailed information on the composition of the raw wastewater used in the experiment. 7](#__RefHeading___Toc7601046)

[**3.** **Results and discussion** 9](#__RefHeading___Toc7601047)

[**3.1.** ***Development of UHPLC-MS/MS conditions*** 9](#__RefHeading___Toc7601048)

[Figure S1. UHPLC-UV chromatogram from simultaneous analysis of BTA (1), IDC (2), CTM (3) and NIF (IS). 9](#__RefHeading___Toc7601049)

[**3.2.** **Selection of SPE conditions** 10](#__RefHeading___Toc7601050)

[3.2.2. *Selection of the eluent* 10](#__RefHeading___Toc7601051)

[Figure S2. Comparison of BTA, IDC and CTM recoveries after extraction by six different elution solvents. 10](#__RefHeading___Toc7601052)

[3.2.3. *Selection of the eluent volume* 11](#__RefHeading___Toc7601053)

[Figure S3. Comparison of BTA, IDC and CTM recoveries after extraction by different elution solvents volumes. 11](#__RefHeading___Toc7601054)

[3.2.4. *Selection of sample pH* 12](#__RefHeading___Toc7601055)

[Figure S4. Comparison of BTA, IDC and CTM recoveries after extraction of samples with different pH. 12](#__RefHeading___Toc7601056)

[3.2.5. *Selection of the sample volume* 13](#__RefHeading___Toc7601057)

[Figure S5. Comparison of BTA, IDC and CTM recoveries after extraction of different samples volume. 13](#__RefHeading___Toc7601058)

[**3.3.** ***Method validation*** 14](#__RefHeading___Toc7601059)

[3.3.1. *Selectivity* 14](#__RefHeading___Toc7601060)

[Figure S6. Selectivity of the developed UHPLC-MS/MS method. 14](#__RefHeading___Toc7601061)

[3.3.2. *Matrix effect* 15](#__RefHeading___Toc7601062)

[Table S5. The matrix effect of BTA, IDC and CTM in model water samples (*n*=6). 15](#__RefHeading___Toc7601063)

[**3.4.** ***Determination of BTA, IDC and CTM and detection of their TPs in wastewater during biotransformation tests*** 16](#__RefHeading___Toc7601064)

[Figure S7. Transformation of organic carbon (A) and nitrogen forms (B) in the wastewater during the biotransformation tests 16](#__RefHeading___Toc7601065)

[Table S6. MRM conditions for the detection of BTA, IDC and CTM transformation products. 17](#__RefHeading___Toc7601066)

[Figure S8. The chemical structures of the [M+H]+ ions and their product ions of 14-OH-CTM and DES-CTM. 18](#__RefHeading___Toc7601067)

[Figure S9. The chemical structures of the [M+H]+ ions and their product ions of TPs-BTA. 19](#__RefHeading___Toc7601068)

1. **Introduction**

Table S1. The structures and chemical properties of 1*H*-benzotriazole, clarithromycin and imidacloprid.

| ***Compound*** | ***Abbreviation*** | ***Chemical structure*** | ***pKaa*** | ***logPb*** | ***Ref.*** |
| --- | --- | --- | --- | --- | --- |
| 1*H*-benzotriazole | BTA | 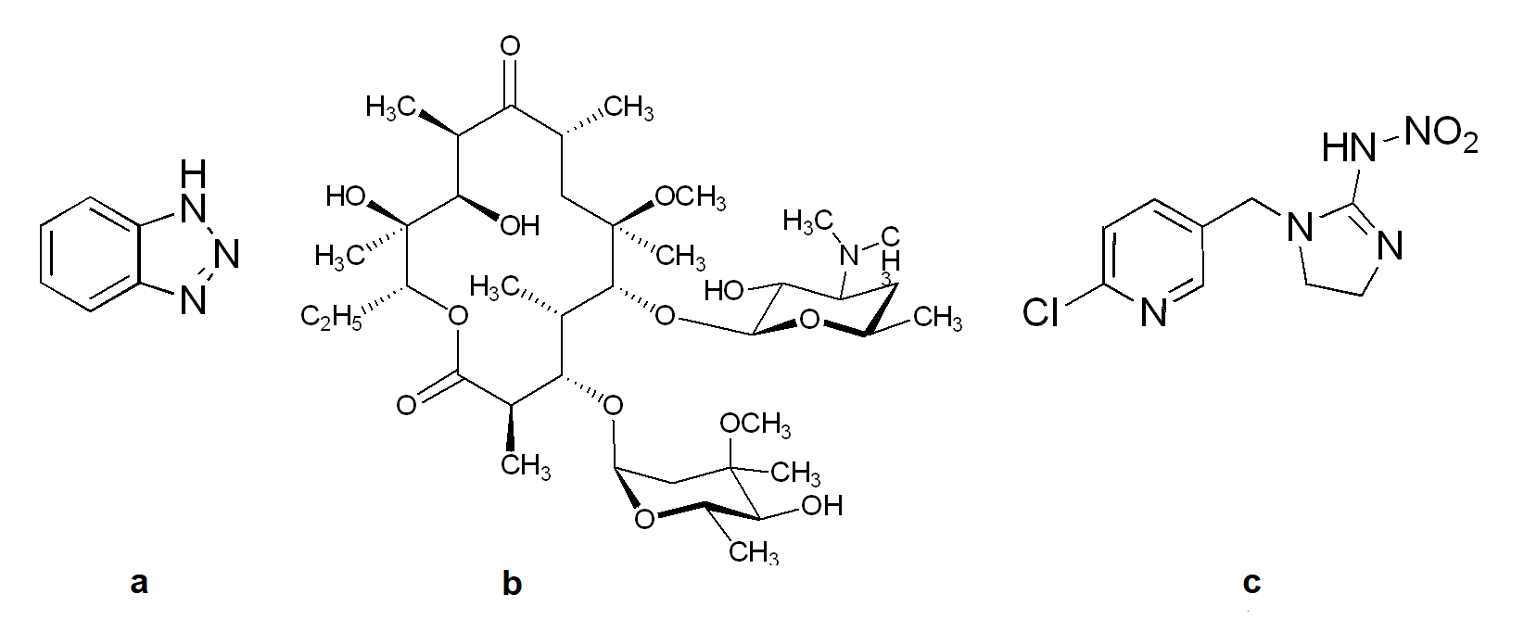 | 8.20 | 1.23 | [1,2] |
| clarithromycin | CTM | 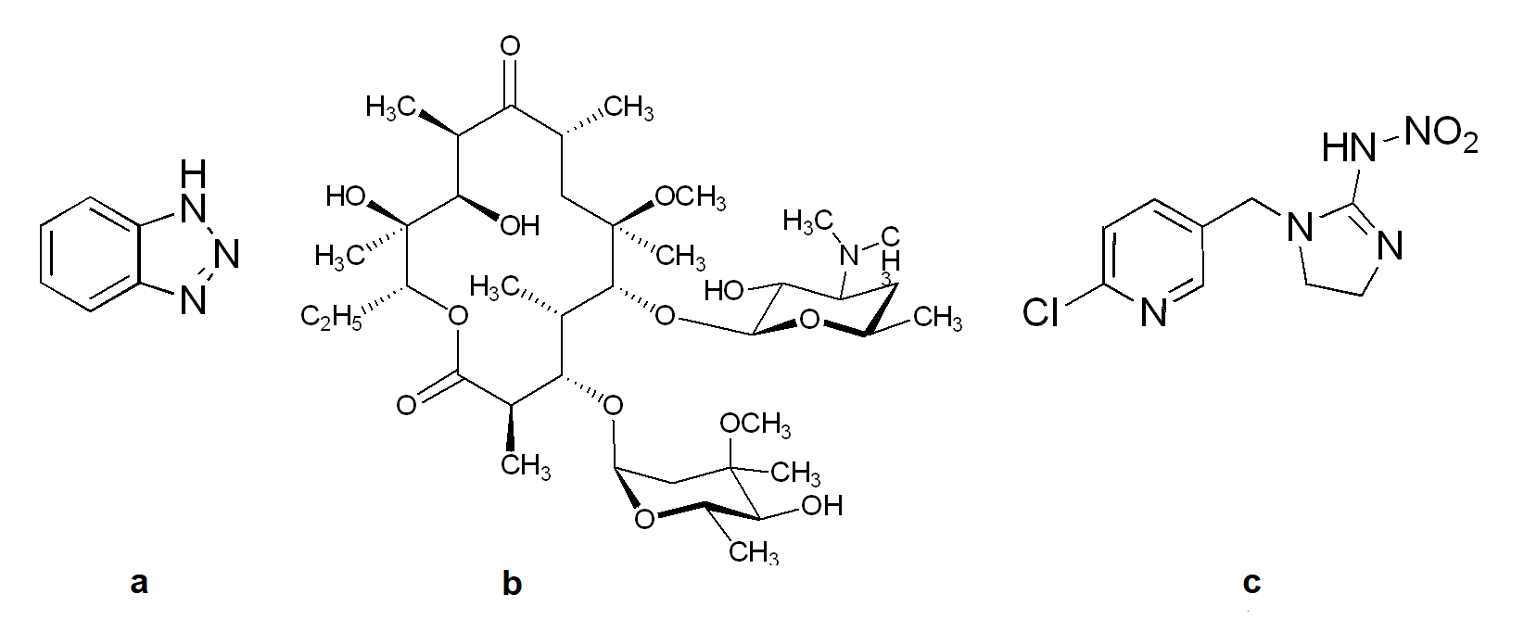 | 8.70 | 3.24 | [3,4] |
| imidacloprid | IDC | 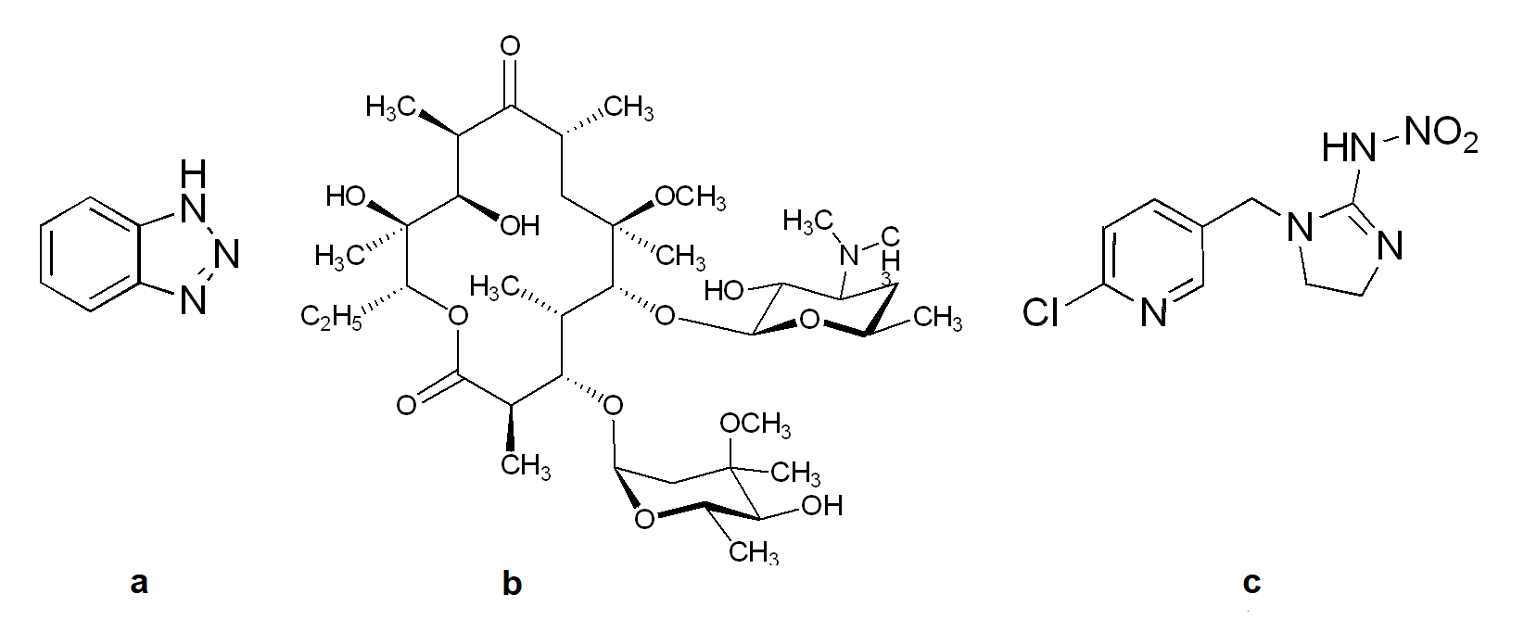 | 11.12 | 0.57 | [5,6] |

apKa - dissociation constant

blogP - partition coefficient

Table S2. Comparison of the developed UHPLC-MS/MS method with methods of determination of 1*H*-benzotriazole, clarithromycin and imidacloprid in water samples described in the literature.

| ***Method*** | ***Matrix*** | ***Compound*** | ***Linear range*** | ***Sensitivity***  ***(LODa/LOQb)*** | ***Analysis time*** | ***Extraction*** | ***Recovery (%)*** | ***Sample volume (mL)/ Flow rate (mL/min)*** | ***Concentration in sample (ng L-1)c*** | ***Ref.*** |
| --- | --- | --- | --- | --- | --- | --- | --- | --- | --- | --- |
| **UHPLC-MS/MS** | river water | 1*H*-benzotriazole | 50-10000 ng L-1 | -/10000 ng L-1 | 11 min | - | - | - | 181-345 | [7] |
| clarithromycin | 10-10000 ng L-1 | n.d. |
| imidacloprid | 5-10000 ng L-1 | n.d. |
| **LC-MS/MS** | river water | 1*H*-benzotriazole | - | -/6.0 ng L-1 | - | SPE | - | - | 378-1850 | [8] |
| clarithromycin | -/60 ng L-1 | n.d. |
| imidacloprid | -/2.0 ng L-1 | 18.2-19.9 |
| **HILIC-MS/MS** | wastewater | clarithromycin | 20-20000 ng L-1 | 0.5/1.6 ng L-1 | 8.5 min | SPE | 37 | 2.5/3.0 | 18-1800 | [9] |
| **LC-MS/MS** | river water,  wastewater | 1*H*-benzotriazole | 10-500 ng L-1 | 8.0/30 ng L-1 | - | SPE | 99 | 100/5.0*  25/5.0** | 636–3690* and  13000-100000** | [10] |
| **UHPLC-MS/MS** | wastewater | 1*H*-benzotriazole | - | 0.77/2.5 ng L-1 | 21 min | SPE | 93-104 | 50/5.0 | 14-2632 | [11] |
| **UHPLC-MS/MS** | wastewater | imidacloprid | - | -/1.8 ng L-1 | 14 min | online SPE | 82-116 | 500/2.0 | 48.6-58.4 | [12] |
| **LC-MS/MS** | river water,  wastewater | 1*H*-benzotriazole | - | 10/20 ng L-1 | 16 min | SPE | 91-106 | 100-500/10 | 33-153* and 62-2994** | [13] |
| **HPLC-MS/MS** | surface water  wastewater | 1*H*-benzotriazole | - | -/10* and -/25 ** ng L-1 | 15 min | SPE | 95-113 | 100/4.0*  50/4.0** | 10-3400* and 9600-11200** | [14] |
| **LC-MS/MS** | river water | imidacloprid | 40-800 ng L-1 | -/10 ng L-1 | 18 min | SPE | 82-103 | 25/4.0 | - | [15] |
| **LC-MS/MS** | water | imidacloprid | 5000-200000 ng L-1 | 60/200 ng L-1 | 30 min | SPE | 100-121 | 250/2.0 | n.d. | [16] |
| **UHPLC–MS/MS** | surface water,  wastewater | clarithromycin | 1000-100000 ng L-1 | -/3.0 ng L-1 | 10 min | SPE | 85-125 | 100/- | 91* and 247** | [17] |
| **UHPLC-ToFMS** | wastewater | clarithromycin | 3.91-500 ng mL-1 | -/3.9 ng mL-1 | 25 min | SPE | 96 | 250/3.0 | 61-1287.9 | [18] |
| **HPLC-MS/MS** | river water and seawater,  wastewater | 1*H*-benzotriazole | 2.5-1400 ng L-1 * and 12.5-7000 ng L-1 ** | -/4.7 ng L-1 * and -/18 ng L-1 ** | 57 min | SPE | 60-100 | 500/15*  100/15** | 29-670* and 3846** | [19] |
| clarithromycin | 2.5-2000 ng L-1 * and 12.5-10000 ng L-1 ** | -/7.5 ng L-1 * and -/18 ng L-1 ** | 14-77* and 520** |

Table S2. Continue.

| ***Method*** | ***Matrix*** | ***Compound*** | ***Linear range*** | ***Sensitivity***  ***(LODa/LOQb)*** | ***Analysis time*** | ***Extraction*** | ***Recovery (%)*** | ***Sample volume (mL)/ Flow rate (mL/min)*** | ***Concentration in sample (ng L-1)c*** | ***Ref.*** |
| --- | --- | --- | --- | --- | --- | --- | --- | --- | --- | --- |
| **LC-MS/MS** | wastewater | 1*H*-benzotriazole | 1-2000 ng L-1 | -/16 ng L-1 | 26 min | online SPE | 86 | 250/2.0 | 226-1380 | [20] |
| clarithromycin | -/14 ng L-1 | 89 | 130-260 |
| imidacloprid | -/15 ng L-1 | 71 | 45-106 |
| **UHPLC-MS/MS** | tap water, wastewater | 1*H*-benzotriazole | 1.0-100 ng L-1 | 0.33/0.98 ng L-1 | 5 min | SPE | 62-102 | 1000/6.0 | 7201 | **this work** |
| clarithromycin | 0.18/0.35 ng L-1 | 1148 |
| imidacloprid | 0.12/0.55 ng L-1 | 217 |

aLOD – limit of detection

bLOQ – limit of quantification

cThe range given for wastewater is related to influent concentrations and effluent concentrations.

* surface water

** wastewater

HILIC-MS/MS - hydrophilic interaction chromatography coupled with tandem mass spectrometry; LC-HR-MS/MS - liquid chromatography-high-resolution tandem mass spectrometry; LC-MS/MS - liquid chromatography with tandem mass spectrometry; SPE - solid-phase extraction; TWs effluent - the effluent from the treatment wetlands system; UHPLC-MS/MS - ultra-high performance liquid chromatography coupled with tandem mass spectrometry; UHPLC-ToFMS - ultra-high performance liquid chromatography combined with time-of-flight mass spectrometry; UPLC-MS/MS - ultra-performance liquid chromatography with tandem mass spectrometry; - not mentioned; n.d. - not determined.

1. **Experimental**
   1. ***Determination of BTA, IDC and CTM and detection of their TPs in wastewater during biotransformation tests.***

Table S3. The detailed information on the composition of the raw wastewater used in the experiment [21].

| ***Componenta*** | ***Concentration (mg L-1)*** |
| --- | --- |
| urea | 208.76 |
| NH4Cl | 62.45 |
| yeast extract | 264.00 |
| skim milk powder | 118.00 |
| sodium acetate | 510.40 |
| peptone | 40.00 |
| KH2PO4 | 41.37 |
| KCr(SO4)2∙12H2O | 0.96 |
| CuSO4∙5H2O | 0.781 |
| MnSO4∙H2O | 0.108 |
| NiSO4∙7H2O | 0.359 |
| PbCl2 | 0.100 |
| ZnCl2 | 0.208 |
| MgSO4∙7H2O | 4.408 |
| FeSO4∙7H2O | 11.6 |

***a*** The influent was prepared in tap water by dissolving the following components.

Table S4. Standard chemical analysis of wastewater.

| ***Parameter*** | ***Method*** |
| --- | --- |
| Dissolved organic carbon (DOC) | The parameter was determined by TOC analyser Shimadzu TOC–L using the non-purgeable organic carbon method. |
| Total nitrogen (TN) | The parameter was determined by TOC analyser Shimadzu TOC–L equipped with a unit for total nitrogen analysis. |
| Ammonium nitrogen (N-NH4) | The parameter was analysed photometrically using Spectroquant tests from Merck (test no. 1.00683.0001) |
| Nitrate nitrogen  (N-NO3) | The parameter was analysed photometrically using Spectroquant tests from Merck (test no. 1.09713.0001) |
| Nitrite nitrogen  (N-NO2) | The parameter was analysed photometrically using Spectroquant tests from Merck (test no. 1.14776.0001) |
| Organic nitrogen (Norg) | The parameter was calculated as: Norg = TN- [(N-NH4) + (N-NO3)+ (N-NO2)] |

1. **Results and discussion**
   1. ***Development of UHPLC-MS/MS conditions***


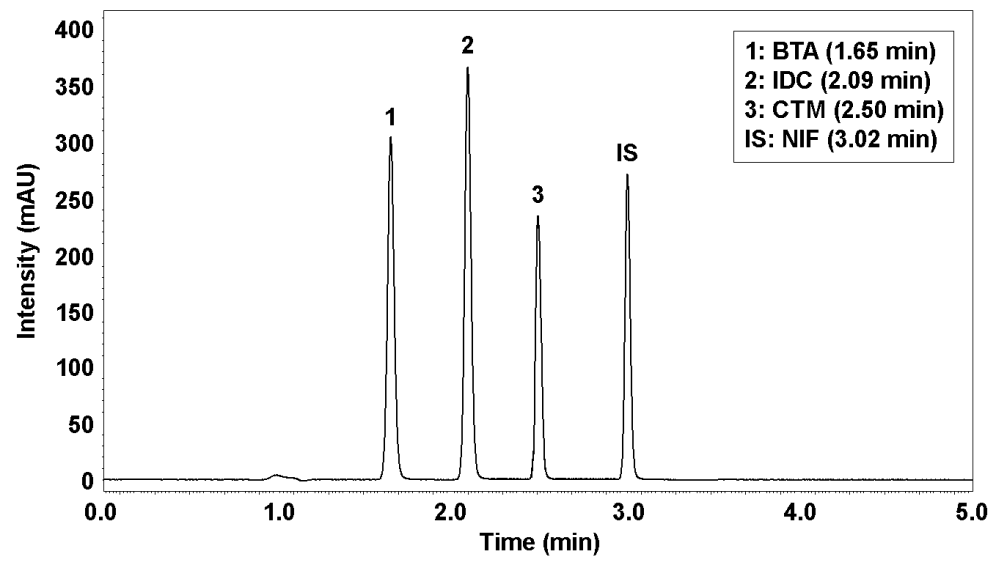

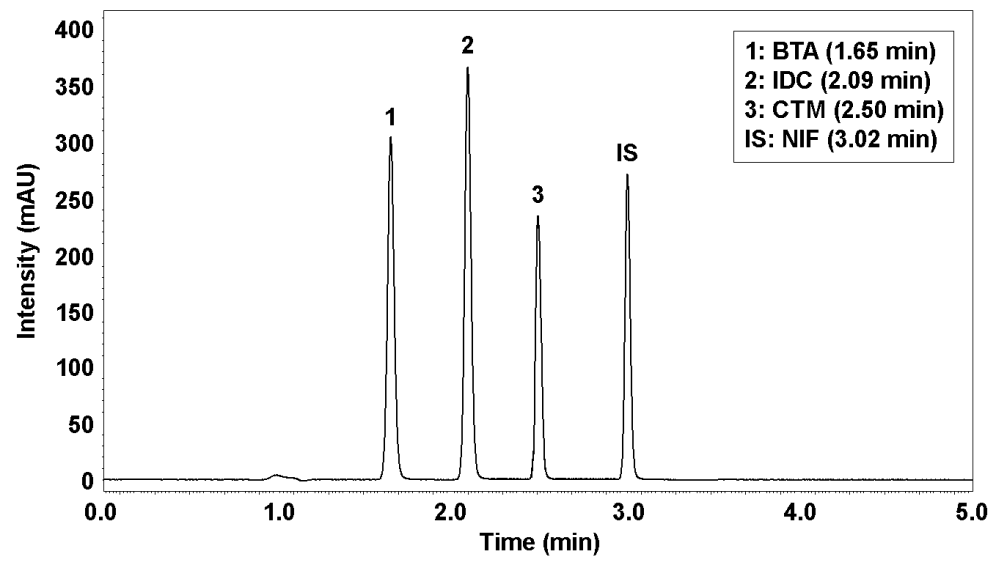
Figure S1. UHPLC-UV chromatogram from simultaneous analysis of BTA (1), IDC (2), CTM (3) and NIF (IS).

- 1. **Selection of SPE conditions**
     1. *Selection of the eluent*


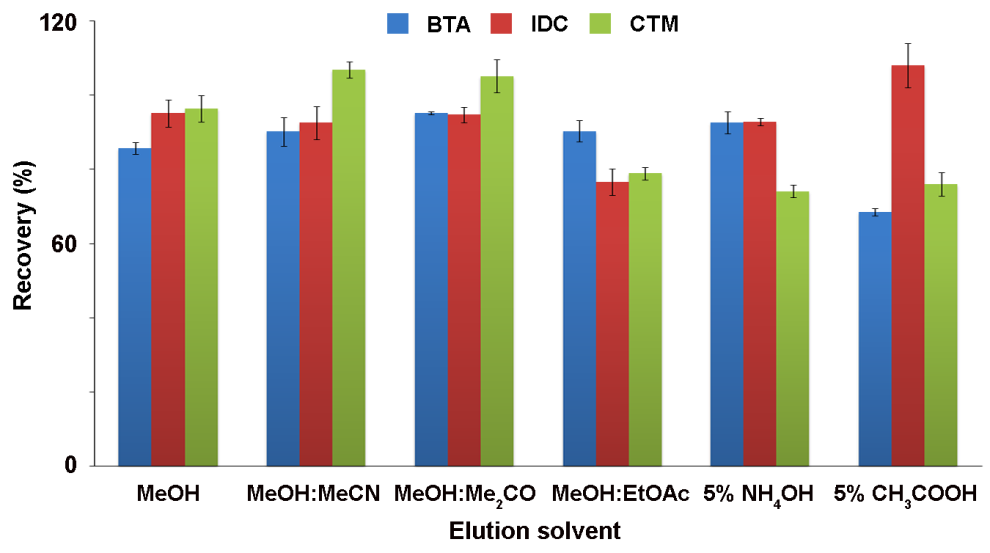


Figure S2. Comparison of BTA, IDC and CTM recoveries after extraction by six different elution solvents.

- - 1. *Selection of the eluent volume*


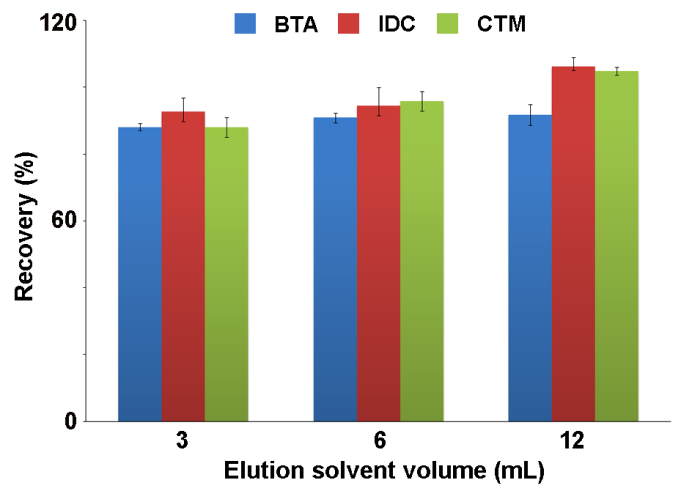


Figure S3. Comparison of BTA, IDC and CTM recoveries after extraction by different elution solvents volumes.

- - 1. *Selection of sample pH*


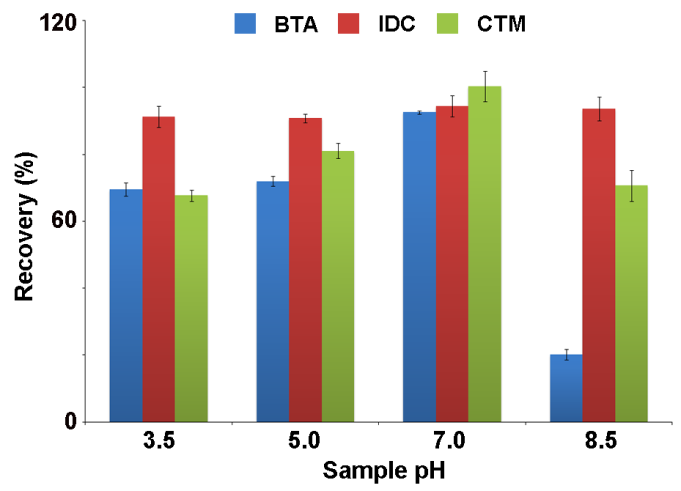


Figure S4. Comparison of BTA, IDC and CTM recoveries after extraction of samples with different pH.

- - 1. *Selection of the sample volume*


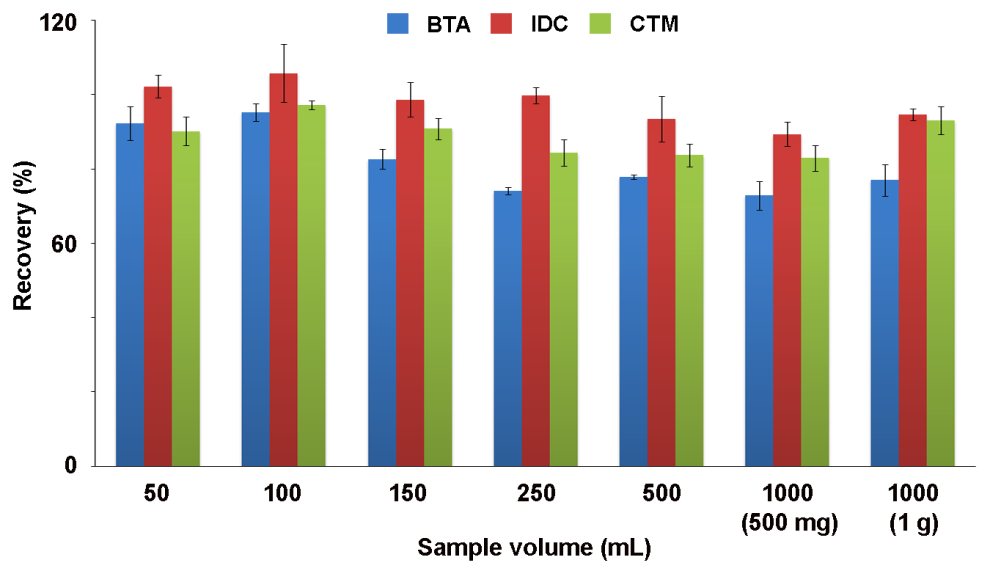


Figure S5. Comparison of BTA, IDC and CTM recoveries after extraction of different samples volume.

***Method validation***

- - 1. *Selectivity*


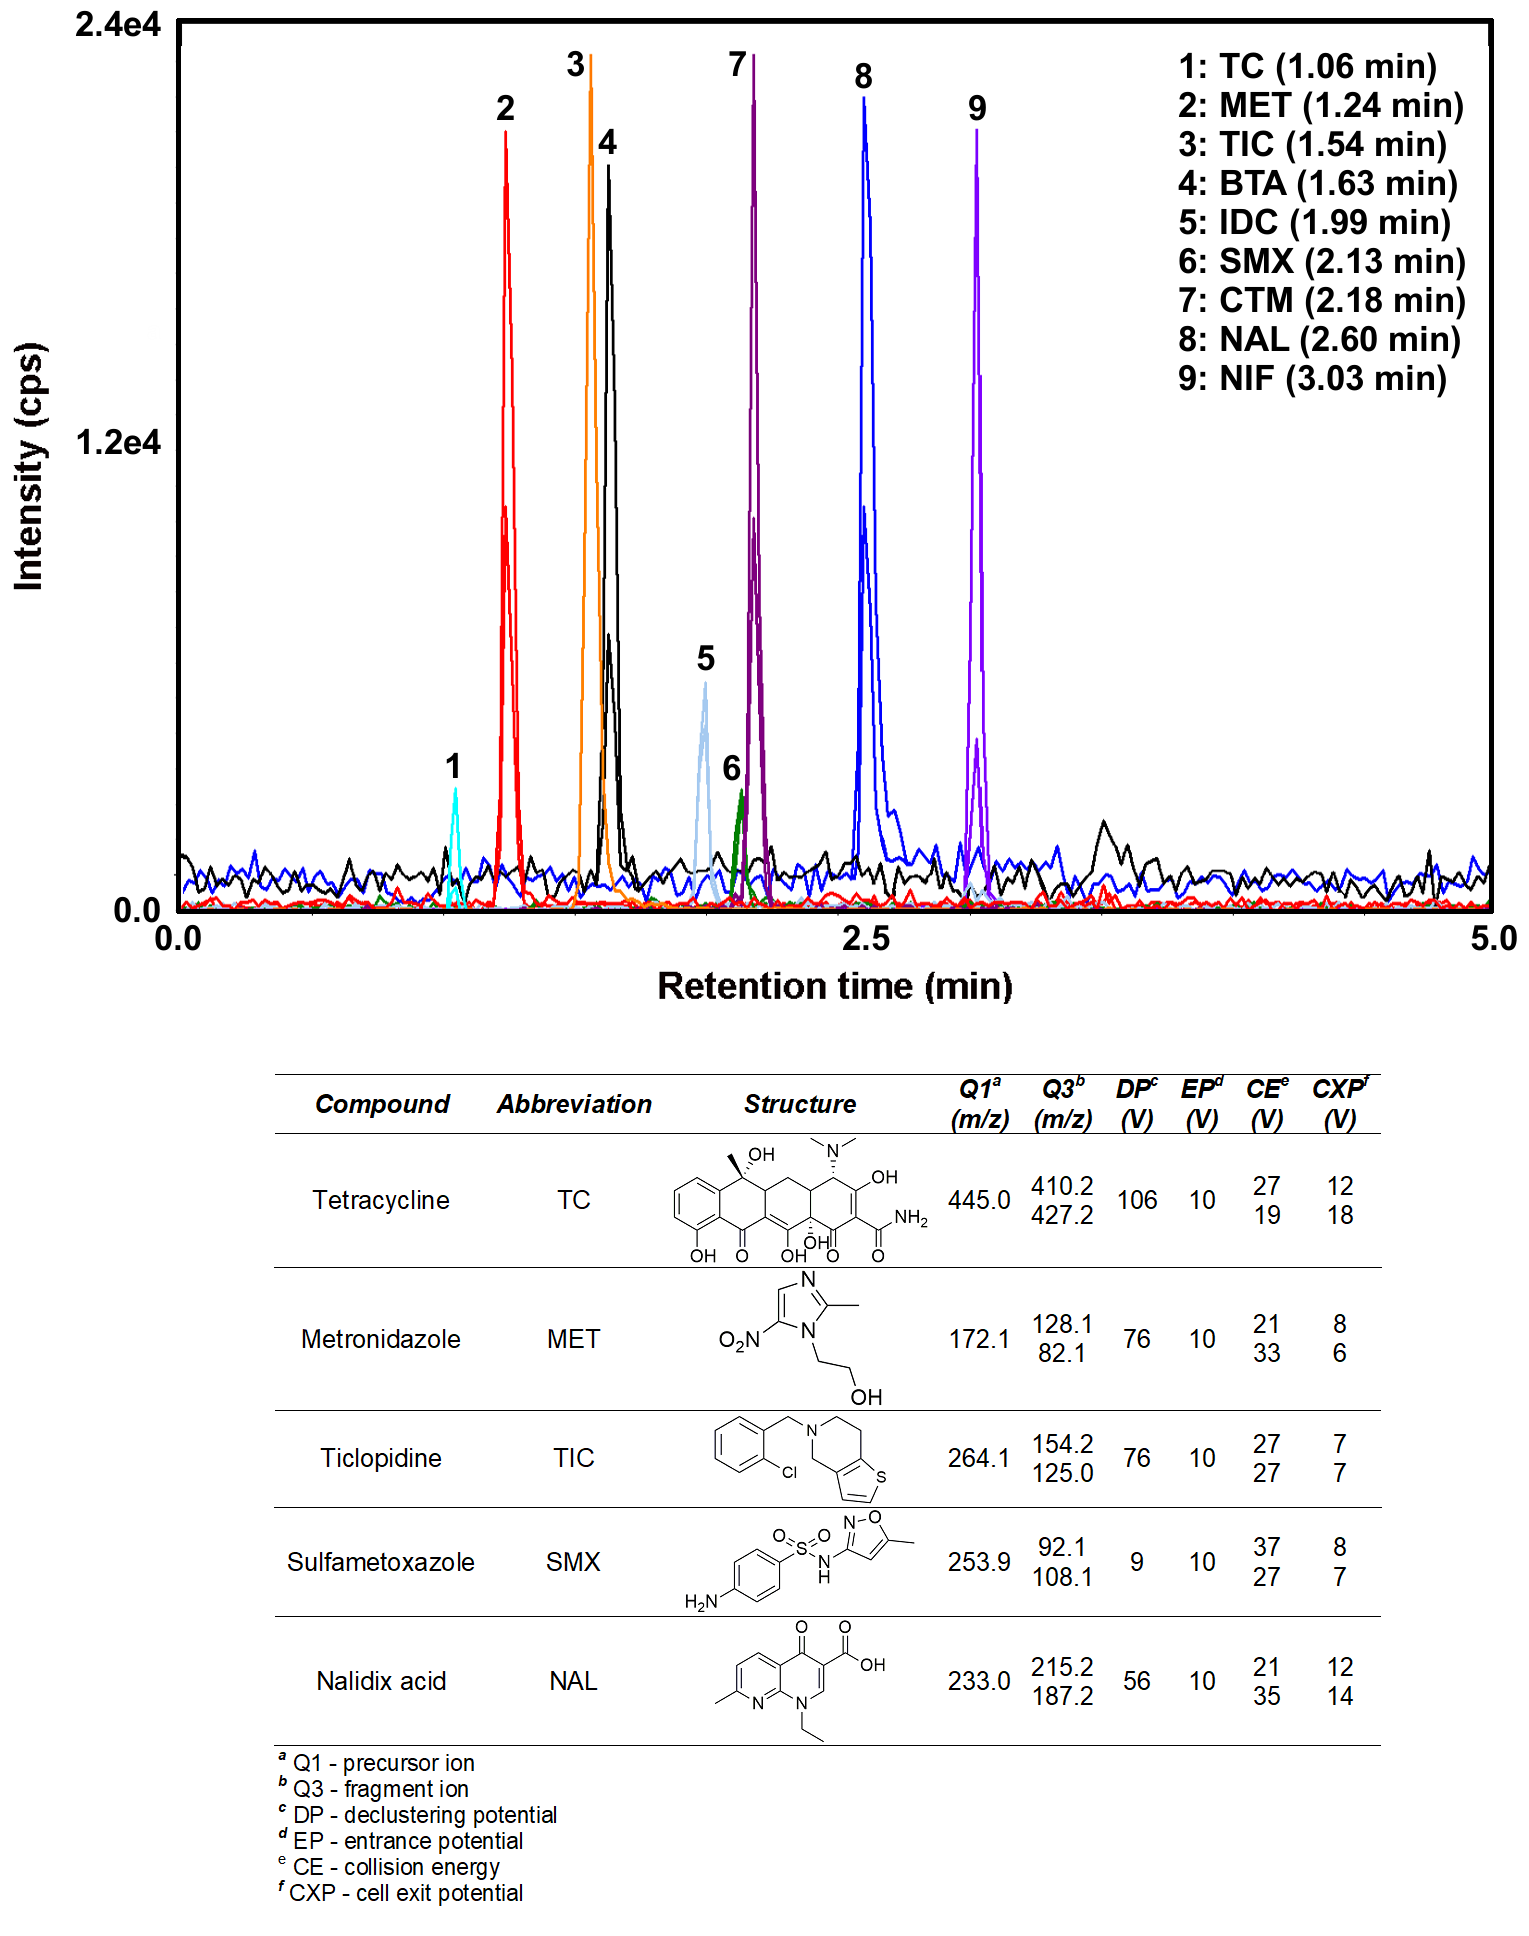


Figure S6. Selectivity of the developed UHPLC-MS/MS method.

- - 1. *Matrix effect*

Table S5. The matrix effect of BTA, IDC and CTM in model water samples (*n*=6).

| ***Analyte*** | ***Concentration (ng L-1)*** | ***Matrix effect (%)*** |
| --- | --- | --- |
| BTA | 5.0 | 5.90 |
| 50.0 | 7.50 |
| 80.0 | 1.79 |
| IDC | 5.0 | 6.38 |
| 50.0 | 11.6 |
| 80.0 | 5.31 |
| CTM | 5.0 | 3.26 |
| 50.0 | 11.1 |
| 80.0 | 1.25 |

- 1. ***Determination of BTA, IDC and CTM and detection of their TPs in wastewater during biotransformation tests***

**
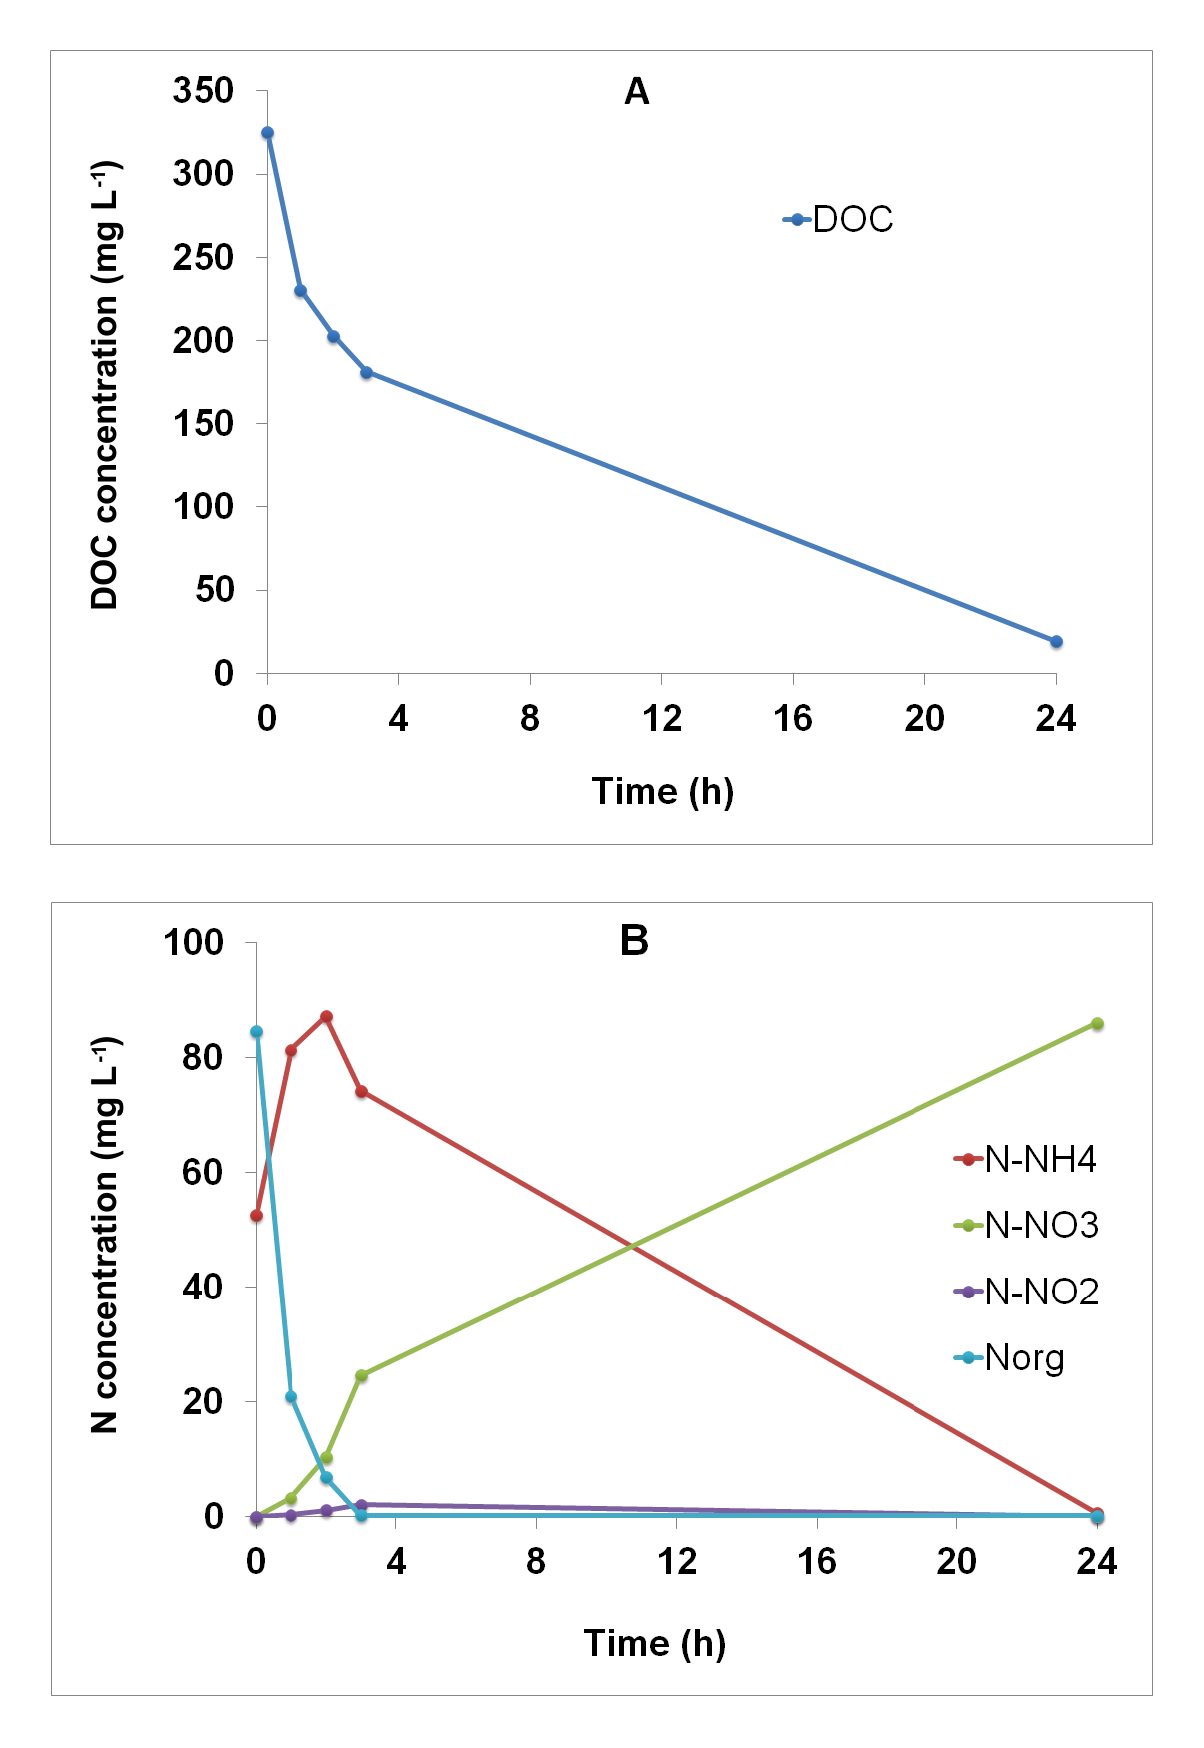
**

Figure S7. Transformation of organic carbon (A) and nitrogen forms (B) in the wastewater during the biotransformation tests

Table S6. MRM conditions for the detection of BTA, IDC and CTM transformation products.

| ***Transformation product*** | ***Q1a (m/z)*** | ***Q3b (m/z)*** | ***DPc (V)*** | ***EPd (V)*** | ***CEe (V)*** | ***CXPf (V)*** | ***Ref.*** |
| --- | --- | --- | --- | --- | --- | --- | --- |
| *TPs-BTA* |  |  |  |  |  |  |  |
| 1-CH3-BTA | 134.1 | 91.0 | 61 | 10 | 33 | 8 |  |
| 4-CH3-BTA | 134.1 | 79.1 | 61 | 10 | 33 | 8 |  |
| 5-CH3-BTA | 134.1 | 77.0 | 61 | 10 | 33 | 8 | [21,22] |
| 1-OH-BTA | 136.1 | 91.0 | 61 | 10 | 33 | 8 |  |
| 4-OH-BTA | 136.1 | 80.1 | 61 | 10 | 33 | 8 |  |
| 5,6-diCH3-BTA | 148.1 | 91.1 | 61 | 10 | 33 | 8 |  |
| *TPs-CTM* |  |  |  |  |  |  |  |
| DES-CTM | 590.4 | 158.0 | 136 | 10 | 18 | 8 | [23,24] |
| 14-OH-CTM | 764.5 | 606.2 | 136 | 10 | 23 | 8 |  |
| *TPs-IDC* |  |  |  |  |  |  |  |
| NH-IDC | 211.4 | 126.4 | 66 | 10 | 24 | 9 |  |
| IDC -urea | 212.2 | 195.3 | 66 | 10 | 24 | 9 |  |
| ketourea-IDC | 226.5 | 209.5 | 66 | 10 | 24 | 9 | [25–28] |
| olefin-IDC | 254.2 | 236.3 | 66 | 10 | 24 | 9 |  |
| OH-IDC | 272.4 | 254.4 | 66 | 10 | 24 | 9 |  |
| 4,5-diOH-IDC | 288.3 | 242.8 | 66 | 10 | 24 | 9 |  |

a Q1 - precursor ion

b Q3 - fragment ion

c DP - declustering potential

d EP - entrance potential

e CE - collision energy

f CXP - cell exit potential

**
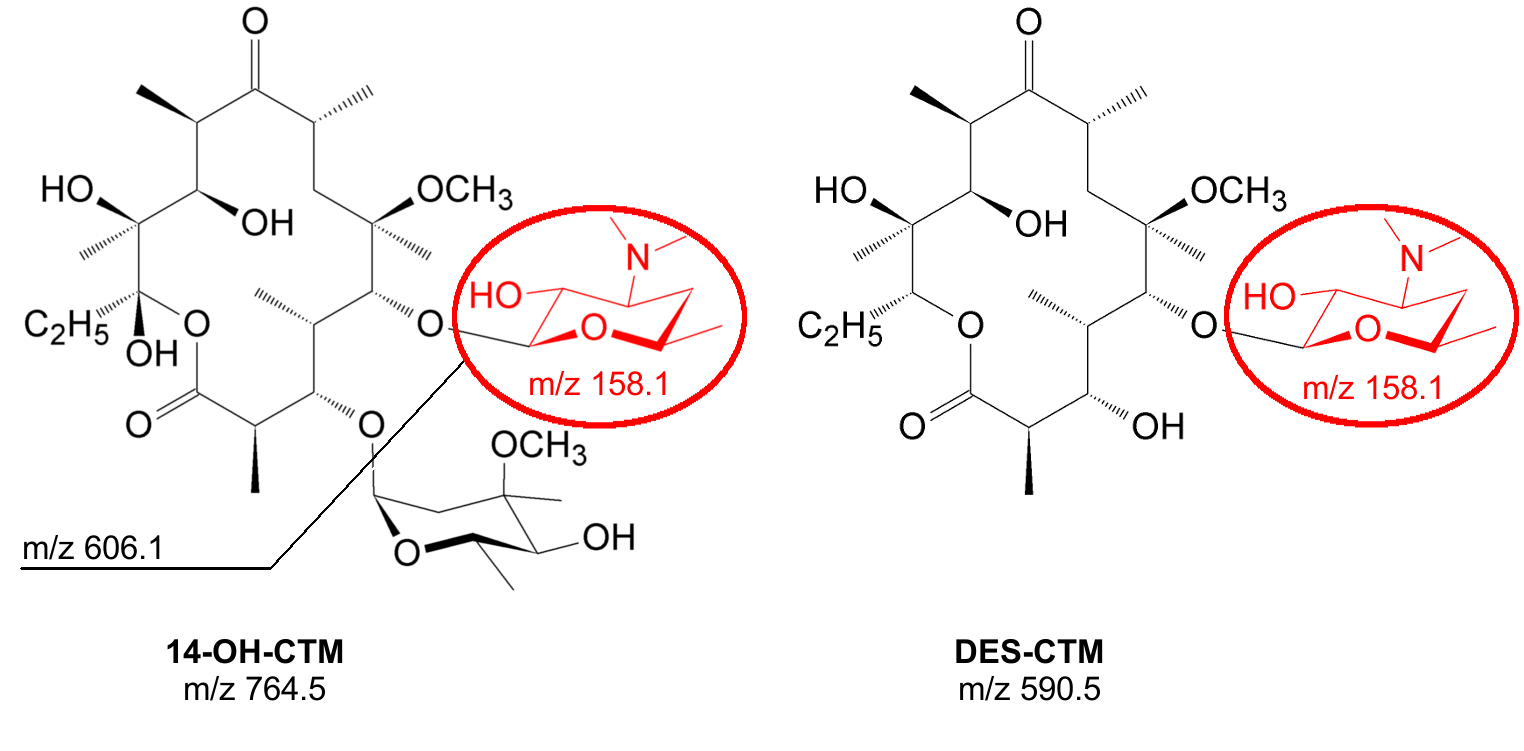
**

Figure S8. The chemical structures of the [M+H]+ ions and their product ions of 14-OH-CTM and DES-CTM.

**
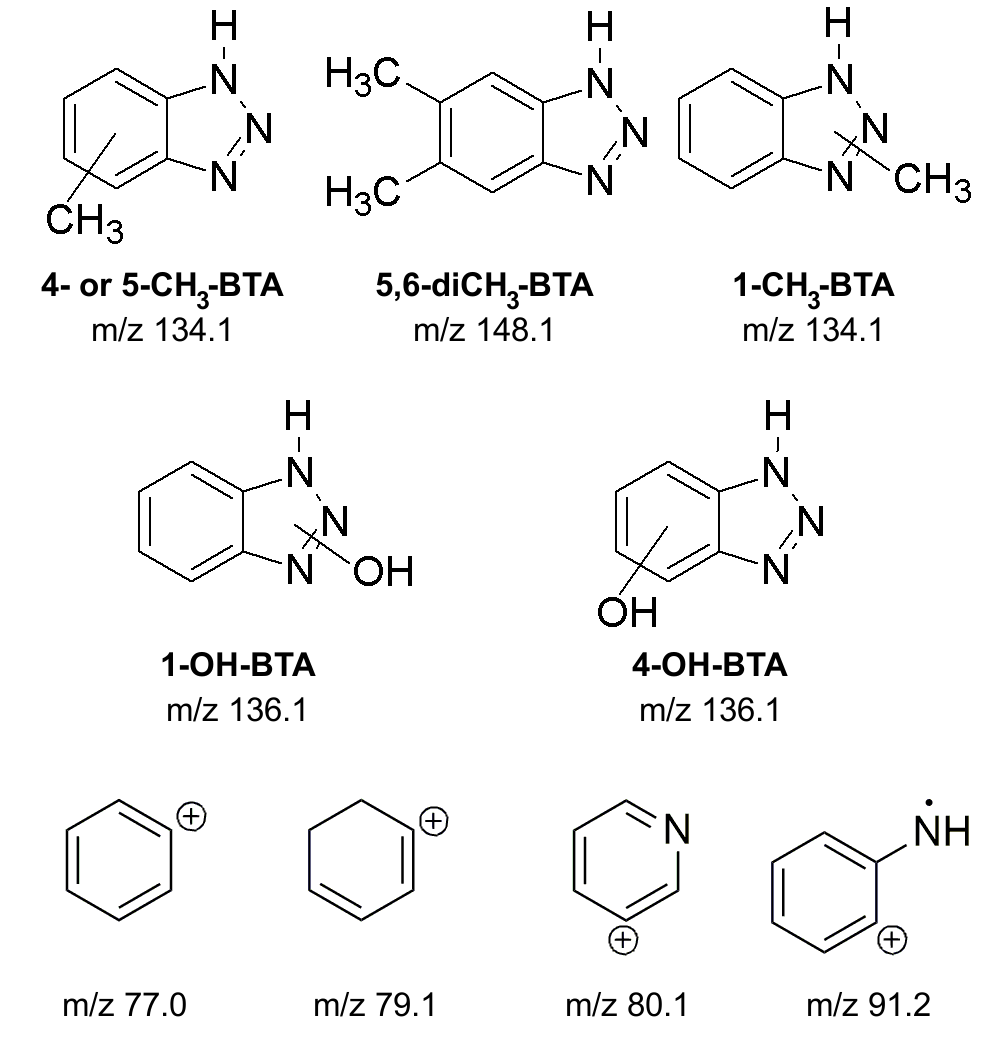
**

Figure S9. The chemical structures of the [M+H]+ ions and their product ions of TPs-BTA.

**References**

[1] A.K. Verma, *Chapter 3 - Benzotriazole and Its Derivatives as Ligands in Coupling Reaction* (Elsevier, 2012).

[2] D.S. Hart, L.C. Davis, L.E. Erickson, and T.M. Callender, **77**, 9 (2004).

[3] Z. Mandić, **2**, 168 (2014).

[4] B. Chen, L. Zhu, F. Zhang, and Y. Qiu, *Process Development and Scale-Up : Twin-Screw Extrusion* (Elsevier Inc., 2017).

[5] A. Mandal, N. Singh, and T.J. Purakayastha, Sci. Total Environ. **577**, 376 (2017).

[6] N. Hassanzadeh, N. Bahramifar, and A.E. Sari, J. Agr. Sci. Tech. **14**, 557 (2012).

[7] Z. Nagy-Kovács, B. László, E. Fleit, K. Czihat-Mártonné, G. Till, H. Börnick, Y. Adomat, and T. Grischek, Water **10**, 1861 (2018).

[8] H. Glorian, H. Börnick, C. Sandhu, and T. Grischek, Water **10**, 1804 (2018).

[9] J. Rossmann, S. Schubert, R. Gurke, R. Oertel, and W. Kirch, J. Chromatogr. B **969**, 162 (2014).

[10] D. Voutsa, P. Hartmann, C. Schaffner, and W. Giger, Environ. Sci. Pollut. Res. **13**, 333 (2006).

[11] A.S. Stasinakis, N.S. Thomaidis, O.S. Arvaniti, A.G. Asimakopoulos, V.G. Samaras, A. Ajibola, D. Mamais, and T.D. Lekkas, Sci. Total Environ. **463**, 1067 (2013).

[12] A.M. Sadaria, S.D. Supowit, and R.U. Halden, Environ. Sci. Technol. **50**, 6199 (2016).

[13] P. Herrero, F. Borrull, E. Pocurull, and R.M. Marcé, J. Chromatogr. A **1309**, 22 (2013).

[14] S. Weiss and T. Reemtsma, Anal. Chem. **77**, 7415 (2005).

[15] T.B. Jordan, D.S. Nichols, and N.I. Kerr, Anal. Bioanal. Chem. **394**, 2257 (2009).

[16] F.F. Donato, M. Kemmerich, J.F. Facco, C.A. Friggi, O.D. Presters, M.B. Adaime, and R. Zanella, Brazilian J. Anal. Chem. **7**, 331 (2012).

[17] E. Gracia-Lor, J. V. Sancho, and F. Hernández, J. Chromatogr. A **1218**, 2264 (2011).

[18] T. Tylová, M. Flieger, and J. Olšovská, Anal. Methods **5**, 2110 (2013).

[19] K. Nödler, T. Licha, K. Bester, and M. Sauter, J. Chromatogr. A **1217**, 6511 (2010).

[20] W. Qi, H. Singer, M. Berg, B. Müller, B. Pernet-Coudrier, H. Liu, and J. Qu, Chemosphere **119**, 1054 (2015).

[21] E. Felis, A. Sochacki, and S. Magiera, Water Res. **104**, 441 (2016).

[22] S. Huntscha, T.B. Hofstetter, E.L. Schymanski, S. Spahr, and J. Hollender, Environ. Sci. Technol. **48**, 4435 (2014).

[23] I. Senta, I. Krizman-Matasic, S. Terzic, and M. Ahel, J. Chromatogr. A **1509**, 60 (2017).

[24] S. Oswald, J. Peters, M. Venner, and W. Siegmund, J. Pharm. Biomed. Anal. **55**, 194 (2011).

[25] M. Seifrtova, T. Halesova, K. Sulcova, K. Riddellova, and T. Erbana, Pest Manag Sci **73**, 1010 (2017).

[26] B. Giroud, A. Vauchez, E. Vulliet, L. Wiest, and A. Buleté, J. Chromatogr. A **1316**, 53 (2013).

[27] R. Žabar, T. Komel, J. Fabjan, M.B. Kralj, and P. Trebše, Chemosphere **89**, 293 (2012).

[28] A. Kamel, J. Agric. Food Chem. **58**, 5926 (2010).

1. Corresponding author.

   E-mail address: sylwia.bajkacz@polsl.pl (S. Bajkacz). [↑](#footnote-ref-2)
